# Supplementary material for: Effect of Ce doping on the structure–activity relationship of MoVOx composite metal oxides
Source: Royal Society of Chemistry journal article supplement (doi:10.1039/d1ra05531c), 2021-01-01
Supplement: d1ra05531c1.pdf [file d1ra05531c1.pdf]

## Liquid chromatogram of products from selective oxidation of benzyl alcohol at different temperatures over MoVO<sub>x</sub> catalysts with different doping ratio of Ce.

Luyao Deng, Shuangming Li\*, Yongwei Liu, Zixuan Lu, Yaoxin Fan, Yunong Yan, Sansan Yu\*

### Supplementary information:

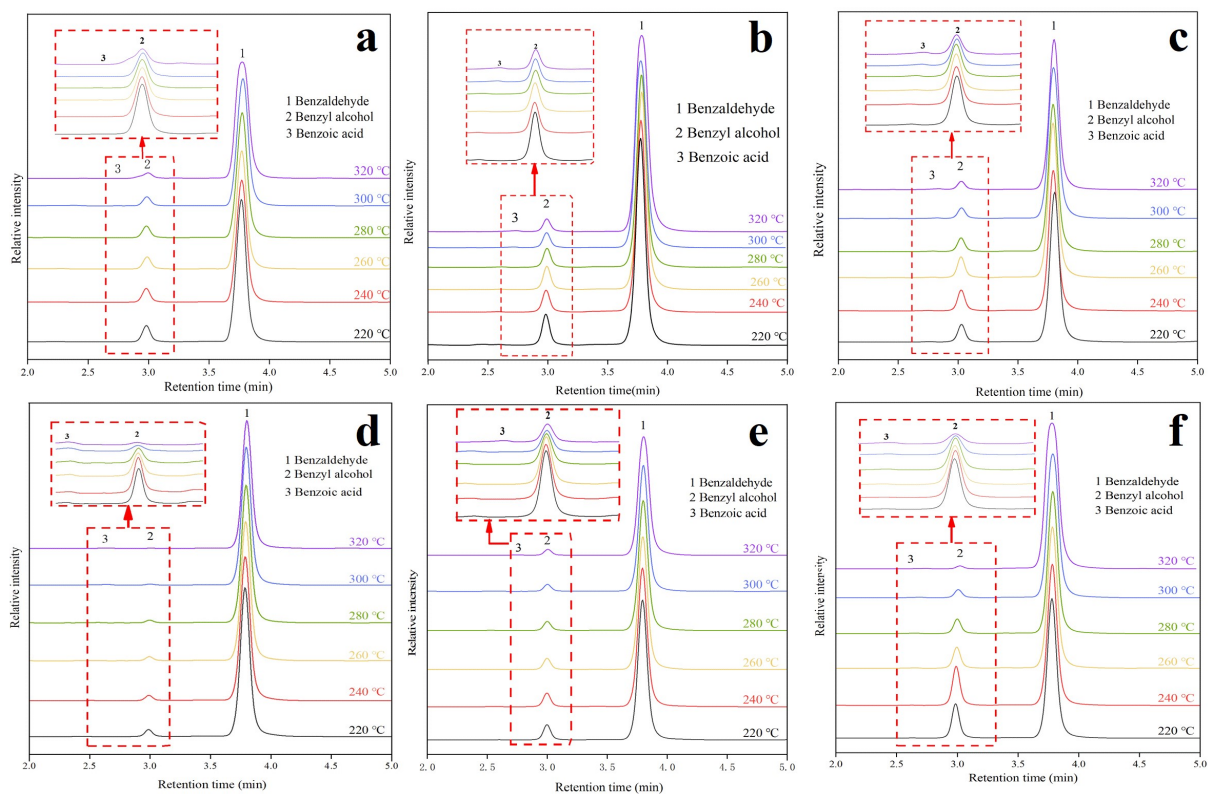

Figure S1: Liquid chromatogram of products from selective oxidation of benzyl alcohol at different temperatures over MoVO<sub>x</sub> catalysts with different doping ratio of Ce. Ce-0 (a), Ce-0.02 (b), Ce-0.05 (c), Ce-0.10 (d), Ce-0.20 (e) and Ce-0.33 (f)
